# Supplementary material
Source: publisher figshare collection journal article supplement (https://acs.figshare.com/ndownloader/files/4074013)
Supplement: Supplementary file 1 [file 4074013]

# Designing Tripodal and Triangular Gadolinium Oxide Nanoplates and Self-Assembled Nanofibrils as Potential Multimodal Bioimaging Probes

*Taejong Paik ‡, Thomas R. Gordon ‡, Andrew M. Prantner<sup>§</sup>, Hongseok Yun ‡, Christopher B.*

*Murray ‡, ‡, \**

*‡Department of Chemistry, University of Pennsylvania, 231 S. 34th Street, Philadelphia, Pennsylvania 19104, United States,*

*‡ Department of Materials Science and Engineering, University of Pennsylvania, 3231 Walnut Street, Philadelphia, Pennsylvania 19104, United States*

*§Penn Ovarian Cancer Research Center, Department of Obstetrics and Gynecology, University of Pennsylvania Perelman School of Medicine, Pennsylvania 19104, United States*

*\*Address correspondence to [cbmurray@sas.upenn.edu](mailto:cbmurray@sas.upenn.edu) [cbmurray@seas.upenn.edu](mailto:cbmurray@seas.upenn.edu).*

## Supporting information

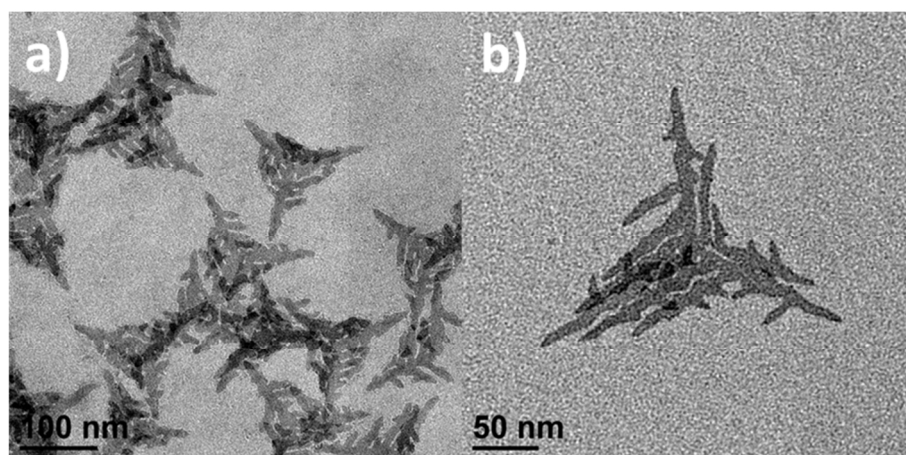

Figure S1 Branched  $\text{Gd}_2\text{O}_3$  nanoplates
